# Supplementary material
Source: Springer Nature journal article supplement (https://www.springermedizin.de/resource/supplementary/13601_2013_1076_MOESM2_ESM.pdf/9678582)

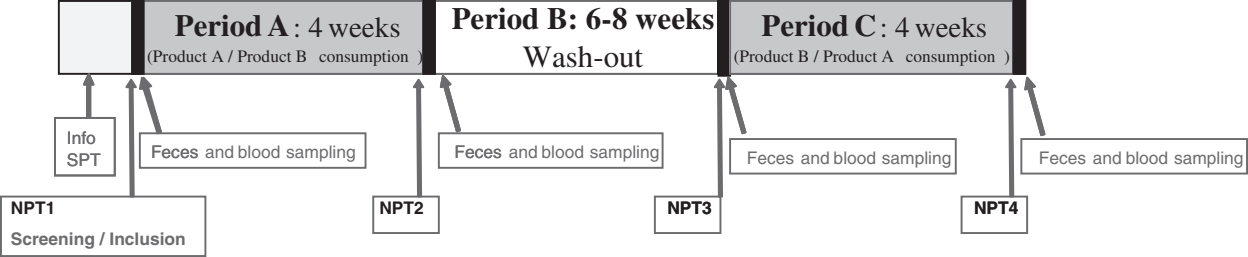

Supplement: MOESM2 [file 9678582]
